# Supplementary material for: Pilanesbergite: a new rock-forming mineral occurring in nepheline syenite from the Pilanesberg Alkaline Complex, South Africa
Source: Copernicus journal article supplement (doi:10.5194/ejm-36-73-2024), 2024-01-16

# Pilanesbergite: a new rock-forming mineral occurring in nepheline syenite from the Pilanesberg Alkaline Complex, South Africa

Fabrice Dal Bo<sup>1,2</sup>, Henrik Friis<sup>1</sup>, Marlina A. Elburg<sup>3</sup>, Frédéric Hatert<sup>2</sup>, Tom Andersen<sup>1,3</sup>

<sup>1</sup>Natural History Museum, University of Oslo, PO Box 1172, Blindern, 0318 Oslo, Norway

<sup>2</sup>Laboratory of Mineralogy B18, University of Liège, B-4000 Liège, Belgium

<sup>3</sup>Departement of Geology, University of Johannesburg, Auckland Park, PO Box 524, 2066, Johannesburg, South Africa

## Supplementary Material (Tables S1, S2 and S3)

**Table S1: Composition of mineral phases used in chemographic modelling.**

| Code                                                                                                                           | Mineral               | Composition                                                                                                                                      |
|--------------------------------------------------------------------------------------------------------------------------------|-----------------------|--------------------------------------------------------------------------------------------------------------------------------------------------|
| <i>Ab</i>                                                                                                                      | Albite                | $\text{NaAlSi}_3\text{O}_8$                                                                                                                      |
| <i>Aeg</i>                                                                                                                     | Aegirine              | $\text{NaFe}^{3+}\text{Si}_2\text{O}_6$                                                                                                          |
| <i>Aen</i>                                                                                                                     | Aenigmatite           | $\text{Na}_4\text{Fe}^{2+}_{10}\text{Ti}_2\text{Si}_{12}\text{O}_{40}$                                                                           |
| <i>Flr</i>                                                                                                                     | Fluorite              | $\text{CaF}_2$                                                                                                                                   |
| <i>Kfs</i>                                                                                                                     | K-feldspar            | $\text{KAlSi}_3\text{O}_8$                                                                                                                       |
| <i>Lrz</i>                                                                                                                     | Lorenzenite           | $\text{Na}_2\text{Ti}_2\text{Si}_2\text{O}_9$                                                                                                    |
| <i>Nph</i>                                                                                                                     | Nepheline             | $\text{KNa}_3(\text{AlSiO}_4)_4$                                                                                                                 |
| <i>pArf</i>                                                                                                                    | Arfvedsonite*         | $\text{K}_{0.4}\text{Na}_{2.2}\text{Ca}_{0.4}\text{Fe}^{2+}_{4.1}\text{Fe}^{3+}_{0.9}\text{Al}_{0.3}\text{Si}_8\text{O}_{22}\text{F}(\text{OH})$ |
| <i>Pbt</i>                                                                                                                     | Pilanesbergite        | $\text{Na}_2\text{Ca}_2\text{Fe}^{2+}_2\text{Ti}_2(\text{Si}_2\text{O}_7)_2\text{O}_2\text{F}_2$                                                 |
| <i>Ti-Aeg</i>                                                                                                                  | Component in aegirine | $\text{NaFe}^{2+}_{0.5}\text{Ti}_{0.5}\text{Si}_2\text{O}_6$                                                                                     |
| <i>Ttn</i>                                                                                                                     | Titanite              | $\text{CaTiSiO}_5$                                                                                                                               |
| <i>Component in melt:</i>                                                                                                      |                       |                                                                                                                                                  |
| <i>Nds</i>                                                                                                                     | Sodium disilicate     | $\text{Na}_2\text{Si}_2\text{O}_5$ component in melt                                                                                             |
| <i>Absent, limit-defining phases:</i>                                                                                          |                       |                                                                                                                                                  |
| <i>Mag</i>                                                                                                                     | Magnetite             | $\text{Fe}^{3+}_2\text{Fe}^{2+}\text{O}_4$                                                                                                       |
| <i>Naj</i>                                                                                                                     | Naujakasite           | $\text{Na}_6\text{FeAl}_4\text{Si}_8\text{O}_{26}$                                                                                               |
| Endmember compositions are used, except for arfvedsonite (*), which is the observed composition in the sample ( <i>pArf</i> ). |                       |                                                                                                                                                  |

**Table S2. Mineral assemblages of pilanesbergite.**

| <i>Ti-free minerals</i>                                                                                                                          | <i>Ti-bearing minerals</i> |                 |
|--------------------------------------------------------------------------------------------------------------------------------------------------|----------------------------|-----------------|
|                                                                                                                                                  | <i>Stable</i>              | <i>Unstable</i> |
| Aeg + Arf + Kfs + Ab + Nph +                                                                                                                     | Ttn                        |                 |
| Aeg + Arf + Kfs + Ab + Nph +                                                                                                                     | Aen                        | Ttn             |
| Aeg + Arf + Kfs + Ab + Nph +                                                                                                                     | Aen + Pbt                  | Ttn             |
| Aeg + Arf + Kfs + Ab + Nph +                                                                                                                     | Pbt                        |                 |
| Aeg + Arf + Kfs + Ab + Nph +                                                                                                                     | Ti-Aeg                     | Pbt             |
| Aeg + Arf + Kfs + Ab + Ntr +                                                                                                                     | Lrz                        |                 |
| <i>Assemblages defining limits for Nds activity:</i>                                                                                             |                            |                 |
| Aeg + Kfs + Ab + Ne + Mt <sup>1</sup>                                                                                                            |                            |                 |
| Aeg + Kfs + Ab + Ne + Naj <sup>2</sup>                                                                                                           |                            |                 |
| <i>Maximum <math>a_{H_2O}</math> limit:</i>                                                                                                      |                            |                 |
| Ab + Ne + Kfs + Ntr                                                                                                                              |                            |                 |
| <i>1: Minimum limit for <math>a_{Nds}</math> in the system</i>                                                                                   |                            |                 |
| <i>2: Maximum limit for <math>a_{Nds}</math> in the system, boundary towards hyperagpaitic conditions in which nepheline is no longer stable</i> |                            |                 |

**Table S3 Low-variance phase reactions in pilanesbergite-bearing Green Foyaite, Pilanesberg Complex, South Africa.**

---

*Aegirine-magnetite* (minimum  $a_{\text{Nds}}$  level for the system, not shown)

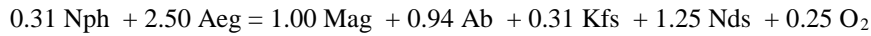

*Neheline-Aegirine-Naujakasite* (maximum  $a_{\text{Nds}}$  level for the system, not shown)

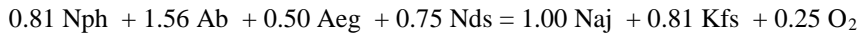

*Albite-nepheline-natrolite*

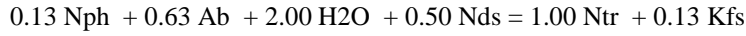

*1: Aenigmatite-titanite*

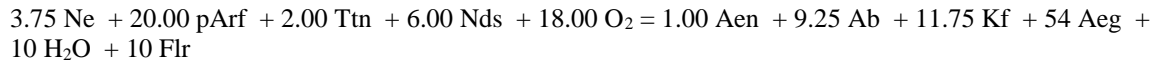

*2: Titanite – Ti-Aegirine*

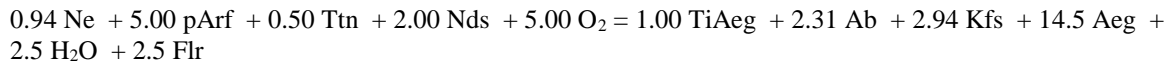

*3: Titanite - Pilanesbergite*

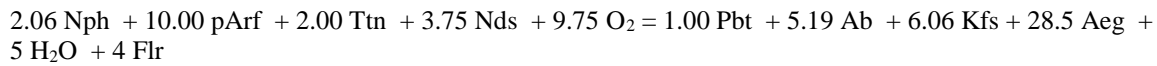

*4: Pilanesbergite – Ti-Aegirine*

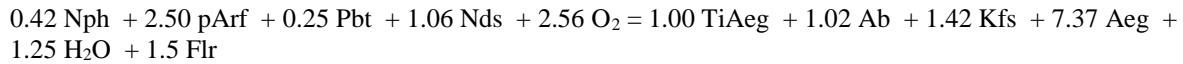

*5: Pilanesbergite-Aenigmatite*

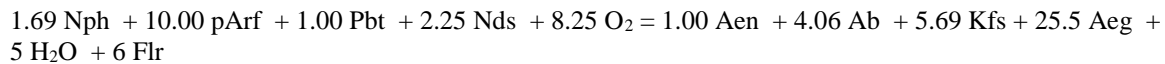

*6: Aenigmatite – Ti-Aegirine*

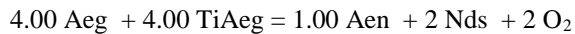

*7: Ti-Aegirine - Lorenzenite*

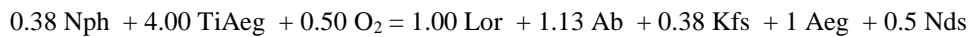

*8: Pilanesbergite - Lorenzenite*

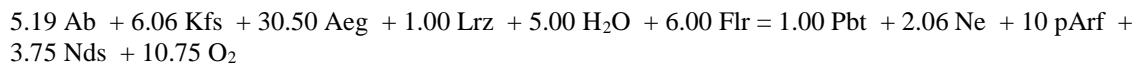

*9: Titanite – Lorenzenite*

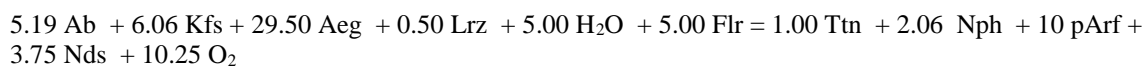

*10: Aenigmatite-Lorenzenite*

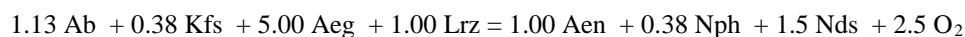

Supplement: Supplementary file 1 [file ejm-36-73-2024-supplement.zip]
