# Supplementary material for: Pilanesbergite: a new rock-forming mineral occurring in nepheline syenite from the Pilanesberg Alkaline Complex, South Africa
Source: Copernicus journal article supplement (doi:10.5194/ejm-36-73-2024), 2024-01-16
Supplement: Supplementary file 2 [file ejm-36-73-2024-supplement.zip]

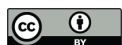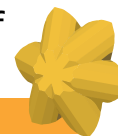

*Supplement of*

**Pilanesbergite: a new rock-forming mineral occurring in nepheline syenite from the Pilanesberg Alkaline Complex, South Africa**

**Fabrice Dal Bo et al.**

*Correspondence to:* Fabrice Dal Bo (fdalbo@uliege.be)

- ejm-36-73-2024-supplement-title-page.pdf
- Pilanesbergite-checkcif.pdf
- Pilanesbergite.cif
- Pilanesbergite.fcf
- Supplementary files.pdf

The copyright of individual parts of the supplement might differ from the article licence.
